# Supplementary material for: Melanin formation in barley grain occurs within plastids of pericarp and husk cells
Source: PubMed Central journal article supplement (PMC6957670; doi:10.1038/s41598-019-56982-y), 2020-01-13
Supplement: 41598_2019_56982_MOESM1_ESM.pdf [file 41598_2019_56982_MOESM1_ESM.pdf]

**Melanin formation in barley grain occurs within plastids of pericarp and husk cells**

Olesya Yu. Shoeva<sup>1\*</sup>, Sergey R. Mursalimov<sup>1</sup>, Natalya V. Gracheva<sup>2</sup>, Anastasiya Yu. Glagoleva<sup>1</sup>,  
Andreas Börner<sup>3</sup>, Elena K. Khlestkina<sup>1,4</sup>

<sup>1</sup> *Institute of Cytology and Genetics SB RAS, Novosibirsk, Russia*

<sup>2</sup> *Volgograd State Technical University, Volgograd, Russia*

<sup>3</sup> *Leibniz Institute of Plant Genetics and Crop Plant Research, Gatersleben, Germany*

<sup>4</sup> *N.I.Vavilov All-Russian Research Institute of Plant Genetic Resources, Saint-Petersburg, Russia*

\*e-mail: olesya\_ter@bionet.nsc.ru

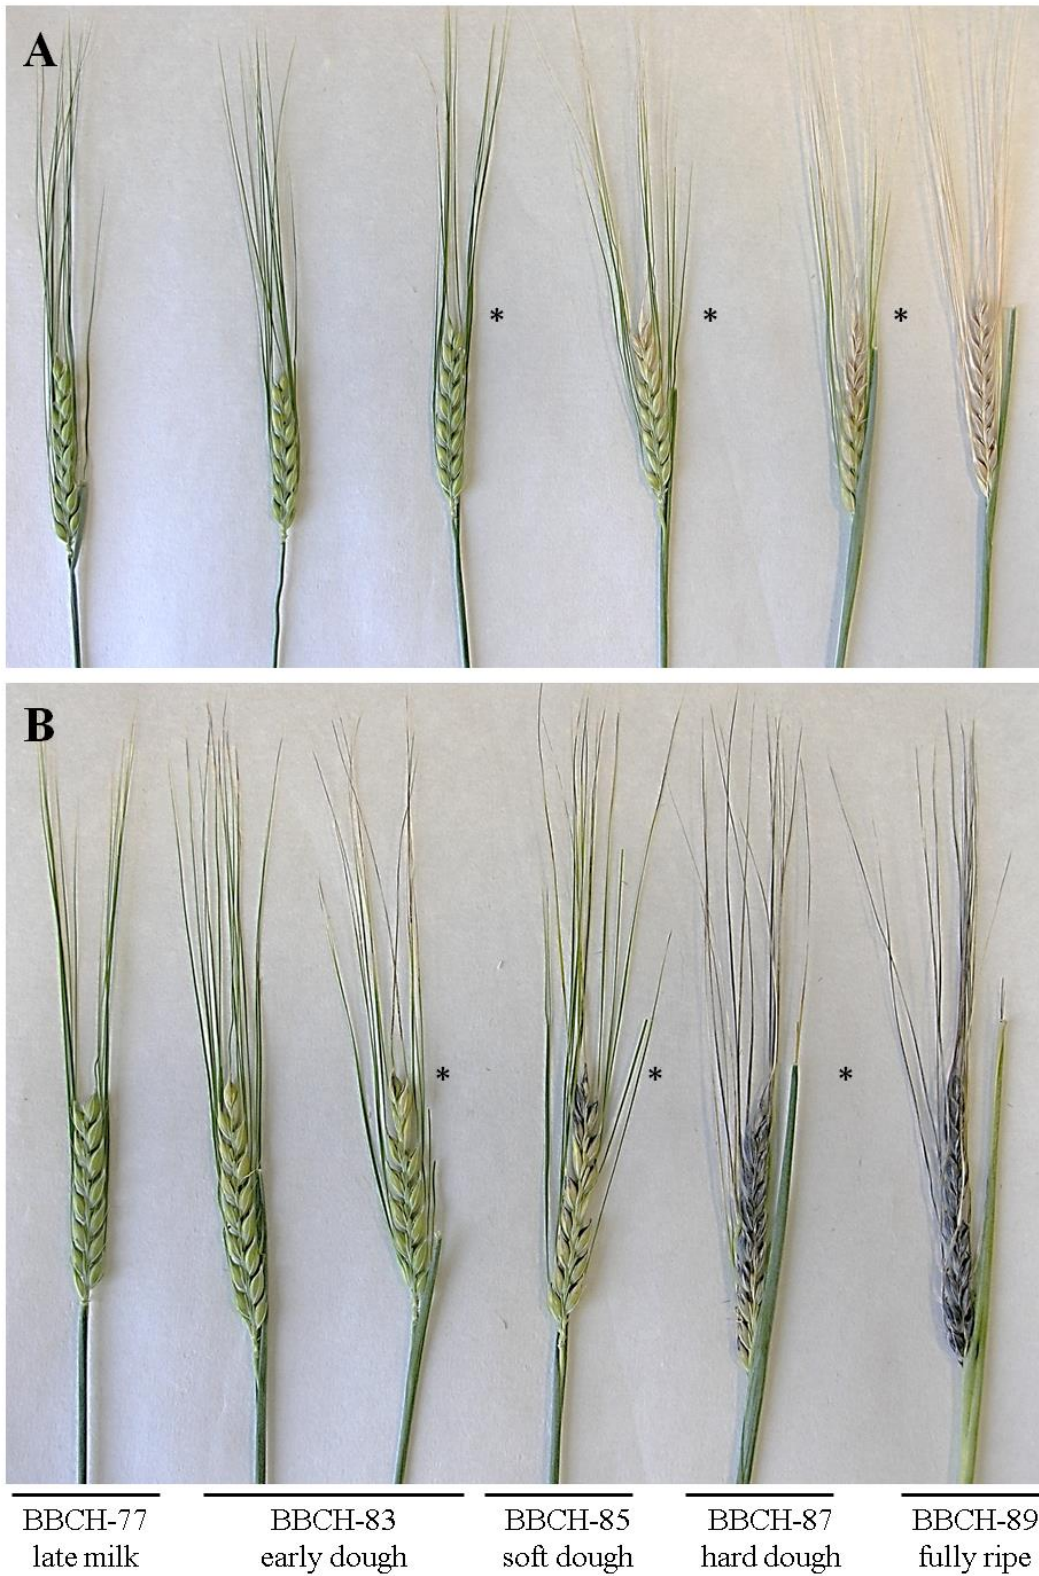

**Fig. S1.** Development of the spike in cv. Bowman (A) and the *i:BwBlp* NIL (B). Asterisks mark the grain developmental stages chosen for sampling.

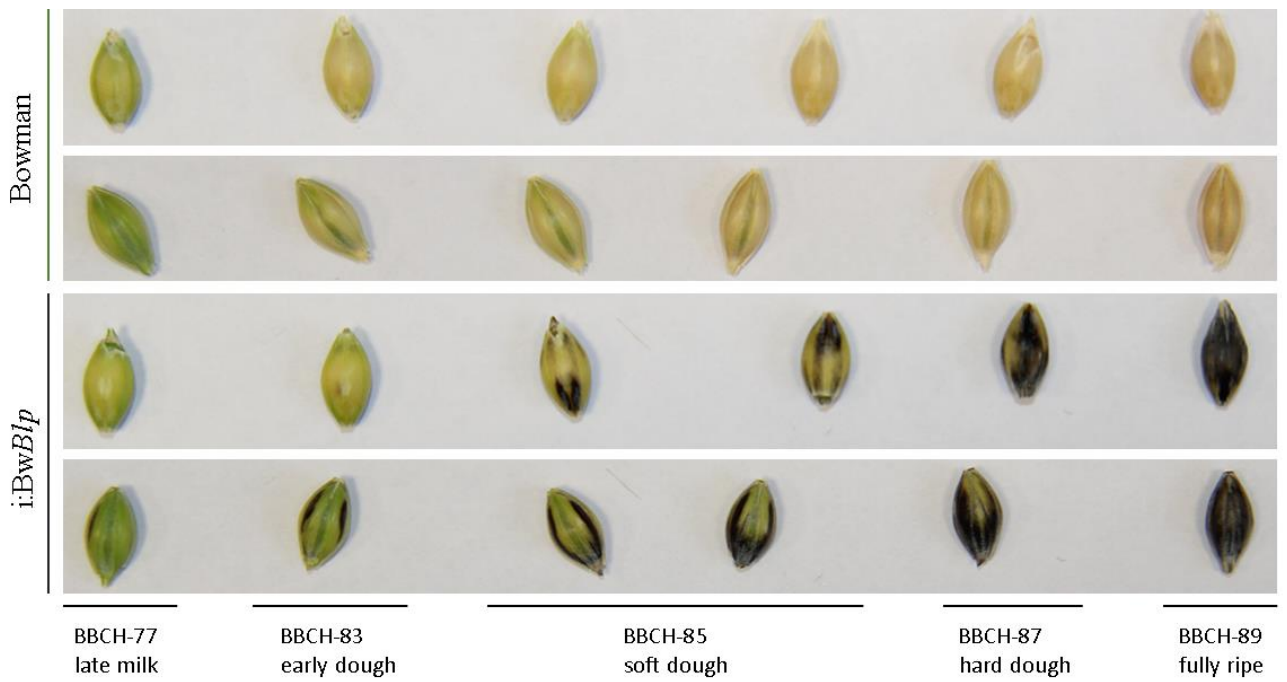

**Fig. S2.** Development of the grain set by cv. Bowman plants and those of the *i:BwBlp* NIL.

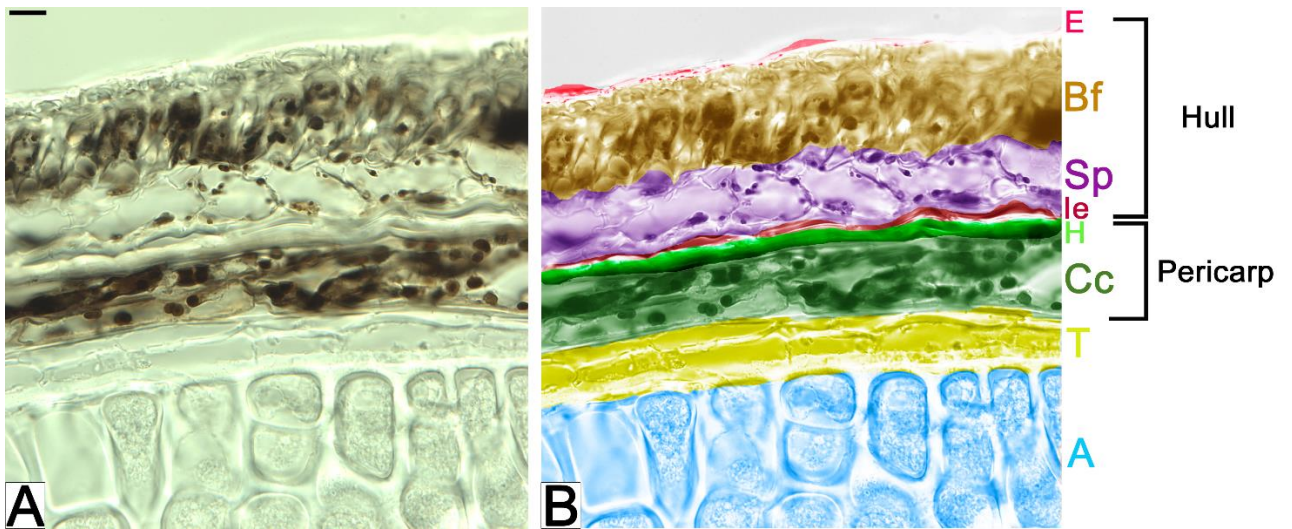

**Fig. S3.** Cross-section of dehusked grain of the *i:BwBlp* NIL sampled at the hard dough stage (A) with manual dyeing of the grain layers using Photoshop CS2 software (Adobe Systems Incorporated) (B). A: aleurone, E: epidermis, Bf: bast fibres, Cc: cross cells, H: hypodermis, le: inner epidermis, Sp: spongy parenchyma, T: testa. Scale bar: 10  $\mu$ m.

**Table S1.** Solubility tests of the black pigment purified from the i:BwBlp NIL. Published protocols used to solubilize anthocyanins and tannins, were ineffective in solubilizing the dark pigment from the i:BwBlp husk and pericarp. Based on ability of the extracted material to dissolve in alkali solutions, discolor under the influence of strong oxidizing agents (H<sub>2</sub>O<sub>2</sub>, KMnO<sub>4</sub>), interaction with FeCl<sub>3</sub> and resistance in common organic solvents, that have been reported as hallmarks of melanin [21], the dark pigment was referred to melanins.

| Solubility                         |                                                                         |
|------------------------------------|-------------------------------------------------------------------------|
| Water and acid                     |                                                                         |
| Water                              | Insoluble                                                               |
| 76% H <sub>2</sub> SO <sub>4</sub> | Partially soluble                                                       |
| Alkali solutions                   |                                                                         |
| 0.5% NaOH                          | Soluble                                                                 |
| Organic solvents                   |                                                                         |
| Ethanol                            | Insoluble                                                               |
| Isopropanol                        | Insoluble                                                               |
| Hexane                             | Insoluble                                                               |
| Petroleum ether                    | Insoluble                                                               |
| Ethyl acetate                      | Insoluble                                                               |
| Hydroxymethylformamide             | Swell                                                                   |
| Oxidizing agents                   |                                                                         |
| 10% H <sub>2</sub> O <sub>2</sub>  | Decolored                                                               |
| 0.1 N KMnO <sub>4</sub>            | Decolored                                                               |
| Interaction with chemicals         |                                                                         |
| 0.5-1.0 mg/ml FeCl <sub>3</sub>    | Precipitation at low concentration and dissolving at high concentration |

## References

Sava VM, Yang S-M, Hong M-Y, Yang P-C, Huang GS (2001) Isolation and characterization of melanic pigments derived from tea and tea polyphenols. Food Chem 73: 177–184.
